# Supplementary material for: Gd/Tb/Eu alloyed double-perovskite lanthanide halides for color tunable photoluminescence and robust scintillation performance
Source: Royal Society of Chemistry journal article supplement (doi:10.1039/d5qi02185e), 2026-01-01
Supplement: d5qi02185e1.pdf [file d5qi02185e1.pdf]

**Gd/Tb/Eu alloyed double-perovskite lanthanide halide for color tunable photoluminescence and robust scintillation performance**

*Su Zhou<sup>\*a</sup>, Linshuai Li<sup>a</sup>, Gaoqing Chen<sup>a</sup>, Jingtao Zhao<sup>a</sup>, Lei Lei<sup>a</sup>*

*a. College of Optical and Electronic Technology, China Jiliang University, Hangzhou 310018, China,*

*\* E-mail: Corresponding Author: zhousu@cjl.u.edu.cn.*

## EXPERIMENTAL SECTION

**Chemicals and Materials:** CsCl (99.99%), NaCl (99.99%), EuCl<sub>3</sub> (99.99%), GdCl<sub>3</sub> (99.99%), TbCl<sub>3</sub> (99.99%), (3-Aminopropyl) triethoxysilane (APTES) (> 95%), Ethyl acetate (AR, ≥99.5%) were purchased from Aladdin. Ethanol (≥99.7%) was purchased from Huzhou Shuanglin chemical Technology Co., Ltd. All the chemical reagents were used as received without further purification.

**Synthesis of submicron Cs<sub>2</sub>NaLnCl<sub>6</sub> (Ln=Gd, Tb, Eu):** Take Cs<sub>2</sub>NaGdCl<sub>6</sub> as a typical example. 0.2 mmol CsCl, 0.1 mmol NaCl, 0.1 mmol GdCl<sub>3</sub> were dissolved in 500 μL DI-water to obtain the salt solvent as precursor. The anti-solvent was achieved by mixing 10 mL ethyl acetate and 10 mL absolute ethyl alcohol dissolving 100 μL APTES. Then, the precursor was added into the anti-solvent drop by drop under vigorous tiring. Suddenly, the white powers were separated out from solvent and further be collected by centrifugation. Prepared were drying in oven at 60°C for three hours. For Tb<sup>3+</sup> and Eu<sup>3+</sup> ions incorporation, given stoichiometric ions are utilized to replace Gd<sup>3+</sup> ions.

**Characterizations:** X-ray diffraction (XRD) analysis was carried out by a powder diffractometer (Bruker D8 Advance) with a Cu-Kα ( $\lambda = 1.5405 \text{ \AA}$ ) radiation. TESCAN VEGA3 S-4300 field-emission electron microscope was executed by a Scanning electron microscope (SEM), with electron energy of 30 keV. PL spectra were recorded on an Edinburgh Instruments (EI) FLS1000 spectrofluorometer equipped with a continuous (450 W) xenon lamp. PLQYs ere measured by the spectrofluorometer (FS1000) equipped with an integrating sphere. XEOL spectra were measured by a spectrometer (OmniFluo960) with an X-ray tube (target material: W, voltage 50 kV, tube current 200 μA) and a photon counter (DCS210PC-9S). X-ray imaging was performed using a home-made setup comprising a miniature X-ray tube and camera (ORCA-Fusion BT, C15440-20UP).

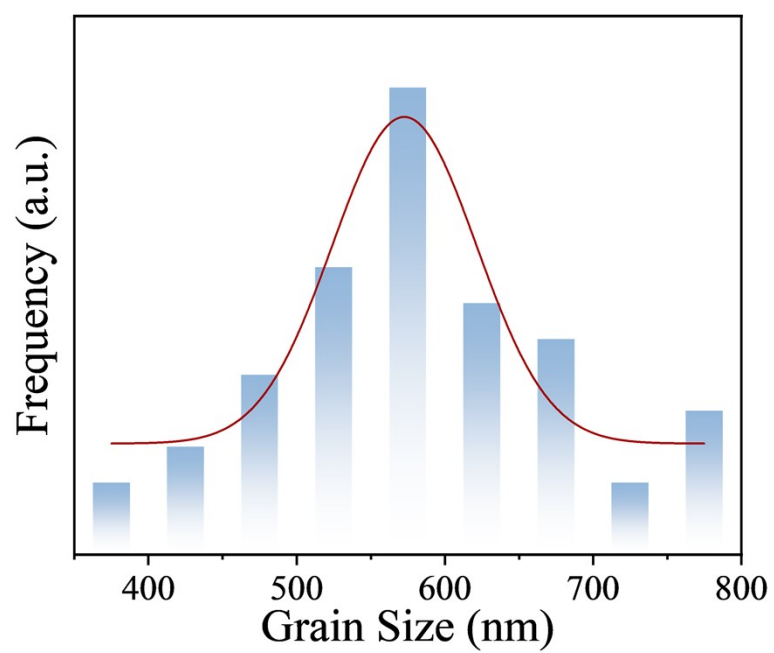

Fig. S1. Statistical histogram of grain size of  $\text{Cs}_2\text{NaTbCl}_6$ .

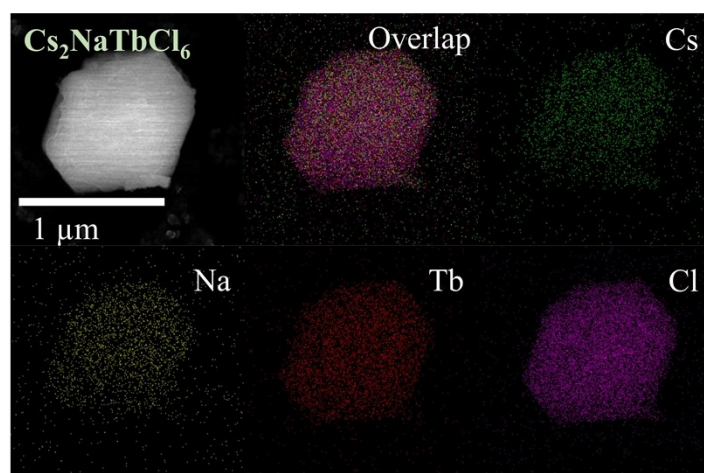

Fig. S2. EDS elemental mapping on  $\text{Cs}_2\text{NaTbCl}_6$ .

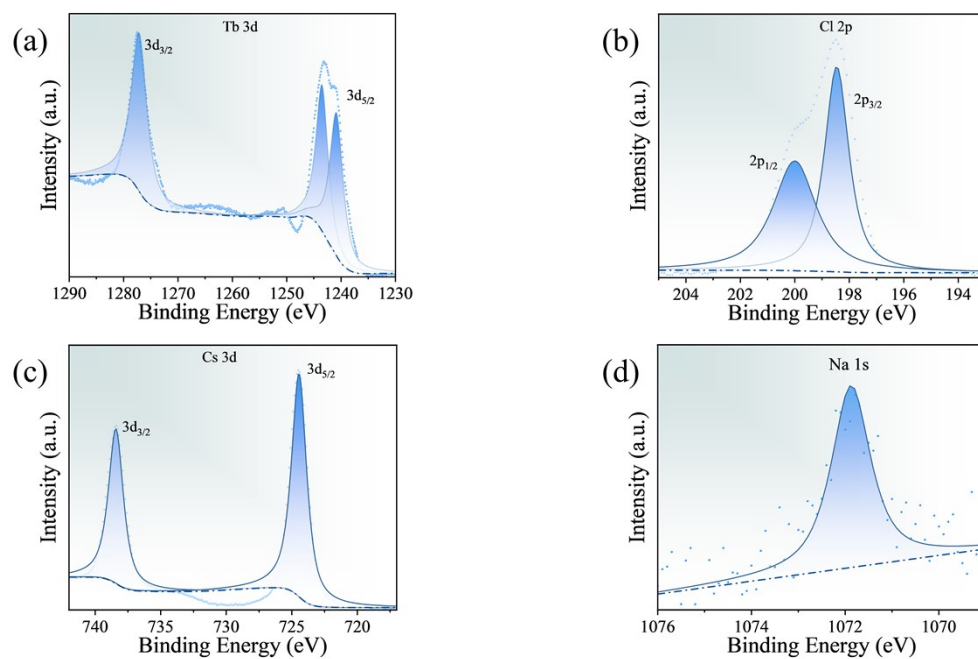

Fig. S3. High-resolution XPS spectra of Tb (a), Cl (b), Cs (c) and Na (d).

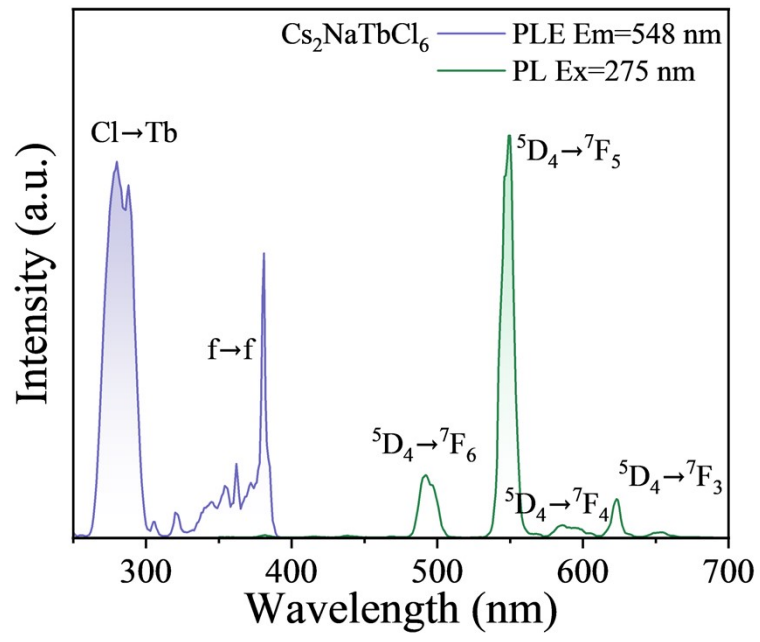

Fig. S4. PLE ( $\text{Em}=548 \text{ nm}$ ) and PL spectra ( $\text{Ex}=275 \text{ nm}$ ) of  $\text{Cs}_2\text{NaTbCl}_6$ .

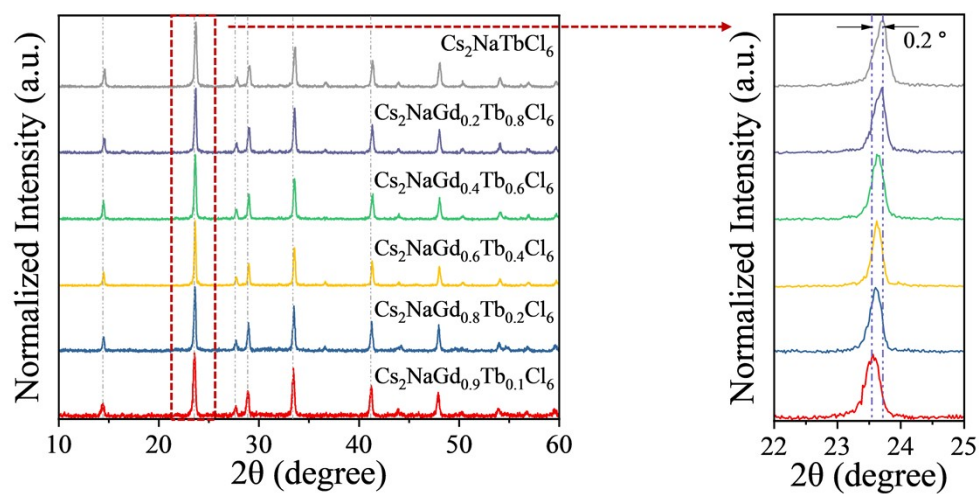

Fig. S5. XRD patterns of a series of  $\text{Cs}_2\text{NaGd}_{1-x}\text{Tb}_x\text{Cl}_6$ , and high-resolution spectra of  $(2\ 2\ 0)$ .

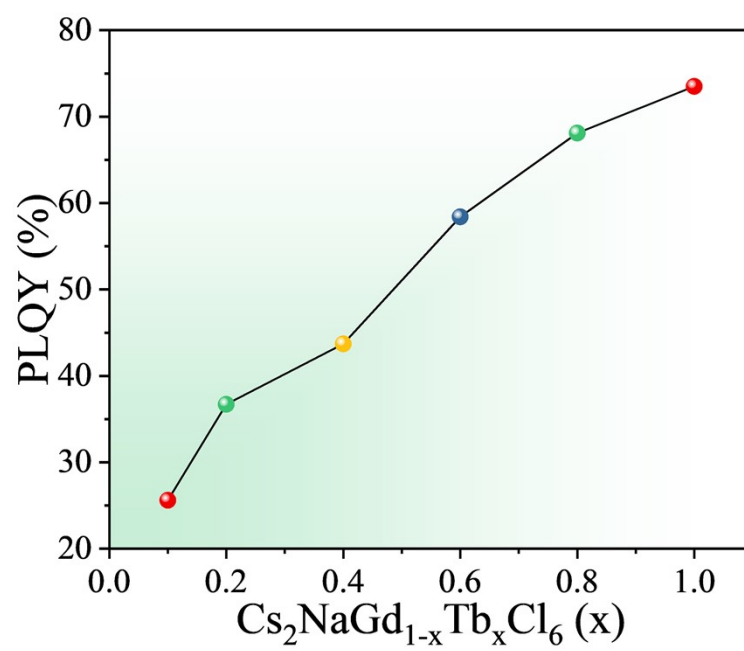

Fig. S6. PLQY of  $\text{Cs}_2\text{NaGd}_{1-x}\text{Tb}_x\text{Cl}_6$  with various Tb concentration (Ex=275 nm).



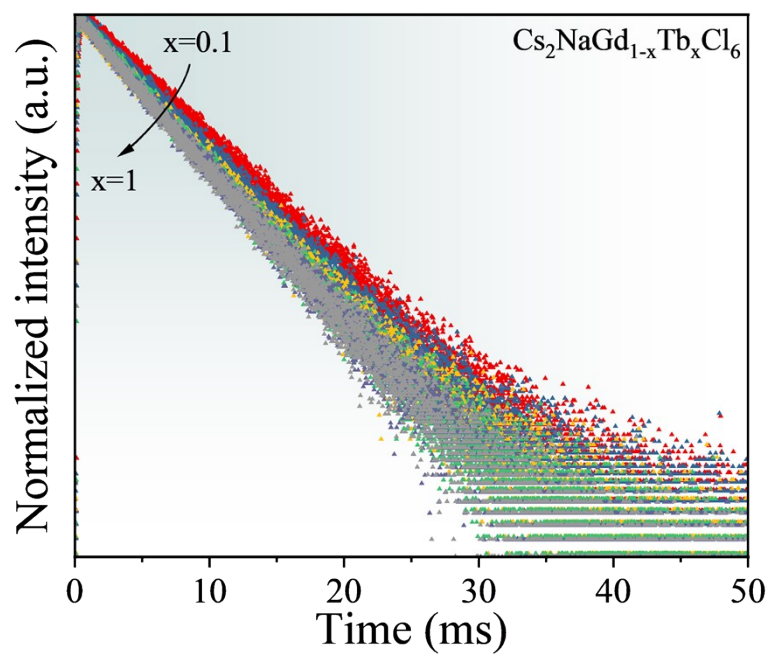

Fig. S7 Photoluminescence decay curves for the  $^5D_4$  level (548 nm).

|        | $\text{Cs}_2\text{NaTb}_{0.95}\text{Eu}_{0.05}\text{Cl}_6$                        | $\text{Cs}_2\text{NaEuCl}_6$                                                       |
|--------|-----------------------------------------------------------------------------------|------------------------------------------------------------------------------------|
| 315 nm |  |  |
| 365 nm |  |  |

Fig. S8. Luminescence images of  $\text{Cs}_2\text{NaTb}_{0.95}\text{Eu}_{0.05}\text{Cl}_6$  and  $\text{Cs}_2\text{NaEuCl}_6$  under 315 nm and 365 nm excitation.

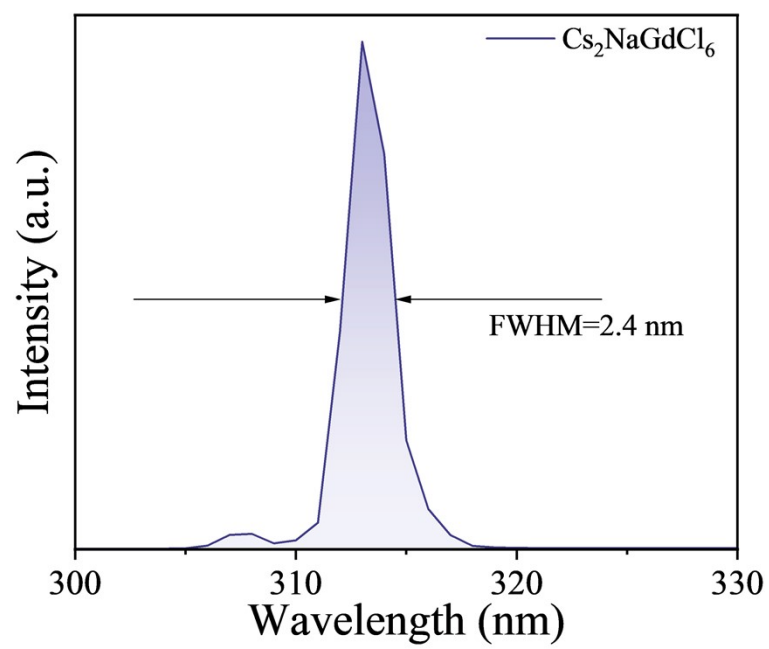

Fig. S9. XEOL spectrum of  $\text{Cs}_2\text{NaGdCl}_6$  showing narrow band emission peak.

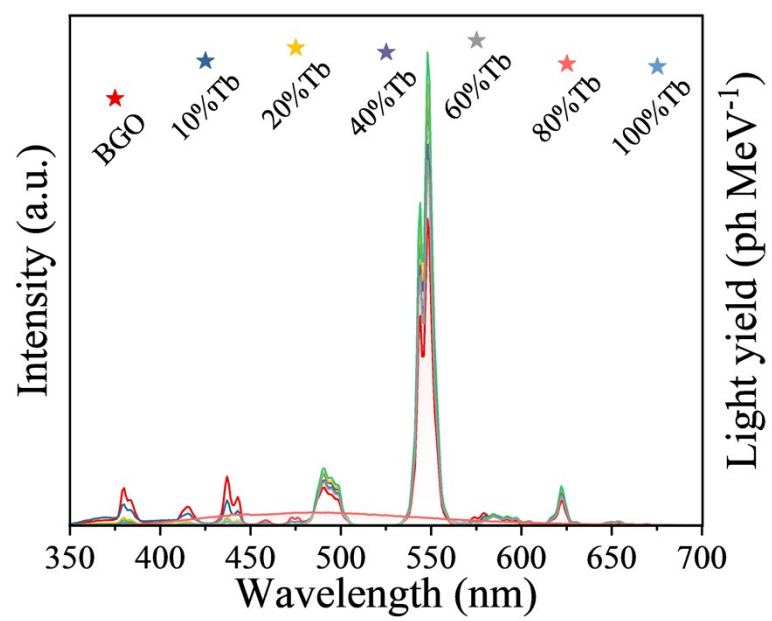

Fig. S10. Quantitative XEOL spectra and corresponding LY with BGO as reference.

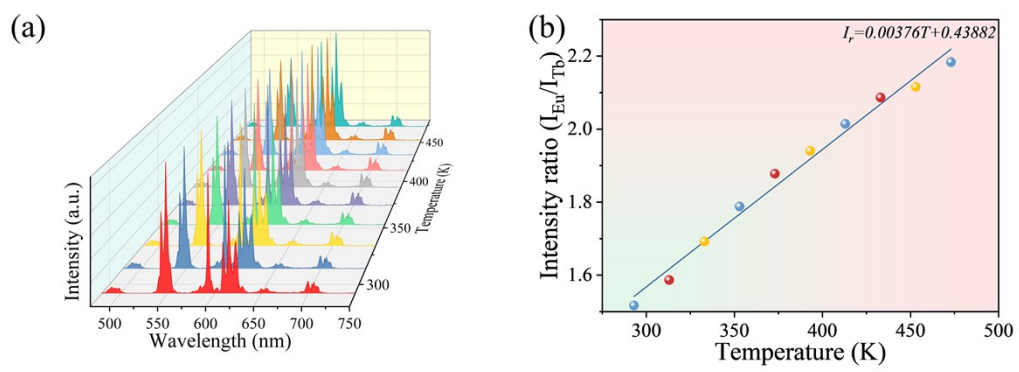

Fig. S11. (a) Temperature dependent XEOL spectra of  $\text{Cs}_2\text{NaGd}_{0.35}\text{Tb}_{0.6}\text{Eu}_{0.05}\text{Cl}_6$ . (b) intensity ratio between the Eu and Tb under various temperature.

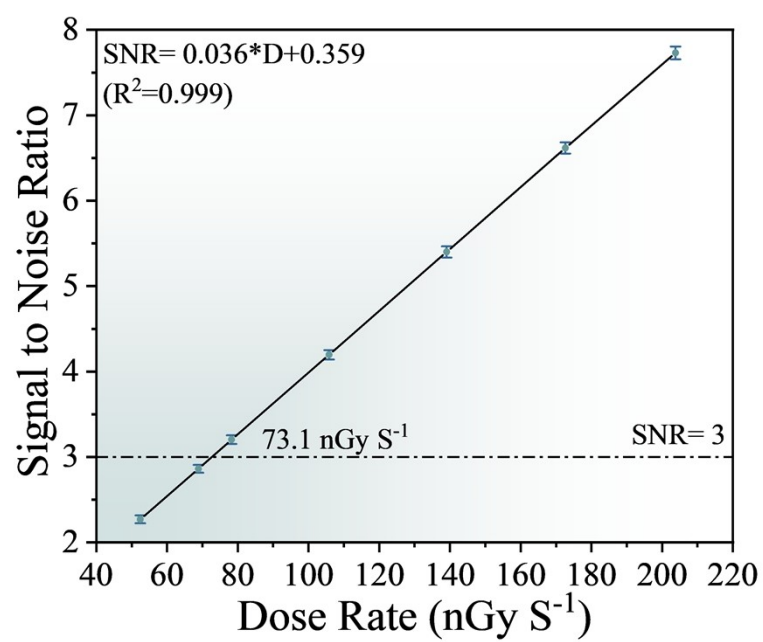

Fig. 12. SNR values of Cs<sub>2</sub>NaGd<sub>0.35</sub>Tb<sub>0.6</sub>Eu<sub>0.05</sub>Cl<sub>6</sub>@PMMA films as a function of dose ratio.

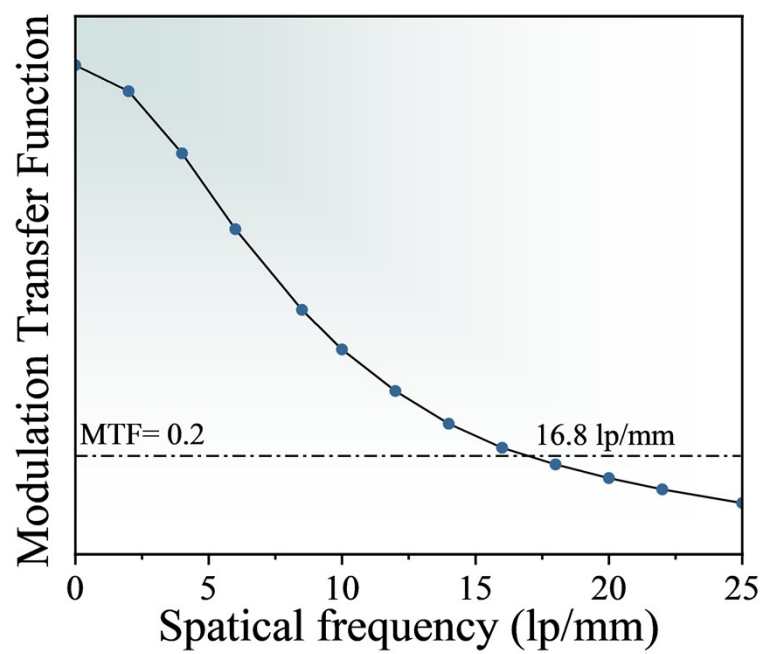

Fig. 13. The MTF plot of  $\text{Cs}_2\text{NaGd}_{0.35}\text{Tb}_{0.6}\text{Eu}_{0.05}\text{Cl}_6$ @PMMA film.

Table S1: The lifetime of 437 nm and 548 nm of Cs<sub>2</sub>NaGd<sub>1-x</sub>Tb<sub>x</sub>Cl<sub>6</sub>.

| Ex=275 nm                                               | Em=437 nm ( <sup>5</sup> D <sub>3</sub> → <sup>7</sup> F <sub>4</sub> ) | Em=548 nm ( <sup>5</sup> D <sub>4</sub> → <sup>7</sup> F <sub>5</sub> ) |
|---------------------------------------------------------|-------------------------------------------------------------------------|-------------------------------------------------------------------------|
| CsNaGd <sub>0.9</sub> Tb <sub>0.1</sub> Cl <sub>6</sub> | 2.52 ms                                                                 | 7.16 ms                                                                 |
| CsNaGd <sub>0.8</sub> Tb <sub>0.2</sub> Cl <sub>6</sub> | 1.42 ms                                                                 | 6.63 ms                                                                 |
| CsNaGd <sub>0.6</sub> Tb <sub>0.4</sub> Cl <sub>6</sub> | 106.6 μs                                                                | 6.29 ms                                                                 |
| CsNaGd <sub>0.4</sub> Tb <sub>0.6</sub> Cl <sub>6</sub> | 40.3 μs                                                                 | 6.02 ms                                                                 |
| CsNaGd <sub>0.2</sub> Tb <sub>0.8</sub> Cl <sub>6</sub> | 27.0 μs                                                                 | 5.98 ms                                                                 |
| CsNaTbCl <sub>6</sub>                                   | 19.6 μs                                                                 | 5.92 ms                                                                 |
